# Supplementary material for: Use of aminothiophenol as an indicator for the analysis of silver nanoparticles in consumer products by surface-enhanced Raman spectroscopy
Source: Royal Society of Chemistry journal article supplement (doi:10.1039/c6an00835f), 2016-01-01

## Use of Amino thiophenol as an Indicator for the Analysis of Silver Nanoparticles in Consumer Products by Surface-Enhanced Raman Spectroscopy

Trang H.D. Nguyen<sup>1</sup>, Peng Zhou<sup>2</sup>, Azlin Mustapha<sup>1</sup>, Mengshi Lin\*<sup>1</sup>

---

*a.* <sup>1</sup> Food Science Program, Division of Food Systems & Bioengineering, University of Missouri, Columbia, MO, USA 65211-5160

*b.* <sup>2</sup> School of Food Science and Technology, Jiangnan University, Wuxi, Jiangsu, China 214122

**Correspondence:** M. Lin, Division of Food System & Bioengineering, University of Missouri, Columbia, MO, USA. 65211; Tel: (573) 884-6718; fax (573) 884-7964. (E-mail: [linme@missouri.edu](mailto:linme@missouri.edu))

Figure S1. SERS intensity of Ag NPs (20 nm) conjugated with PATP at 1079 and 1143  $\text{cm}^{-1}$ .

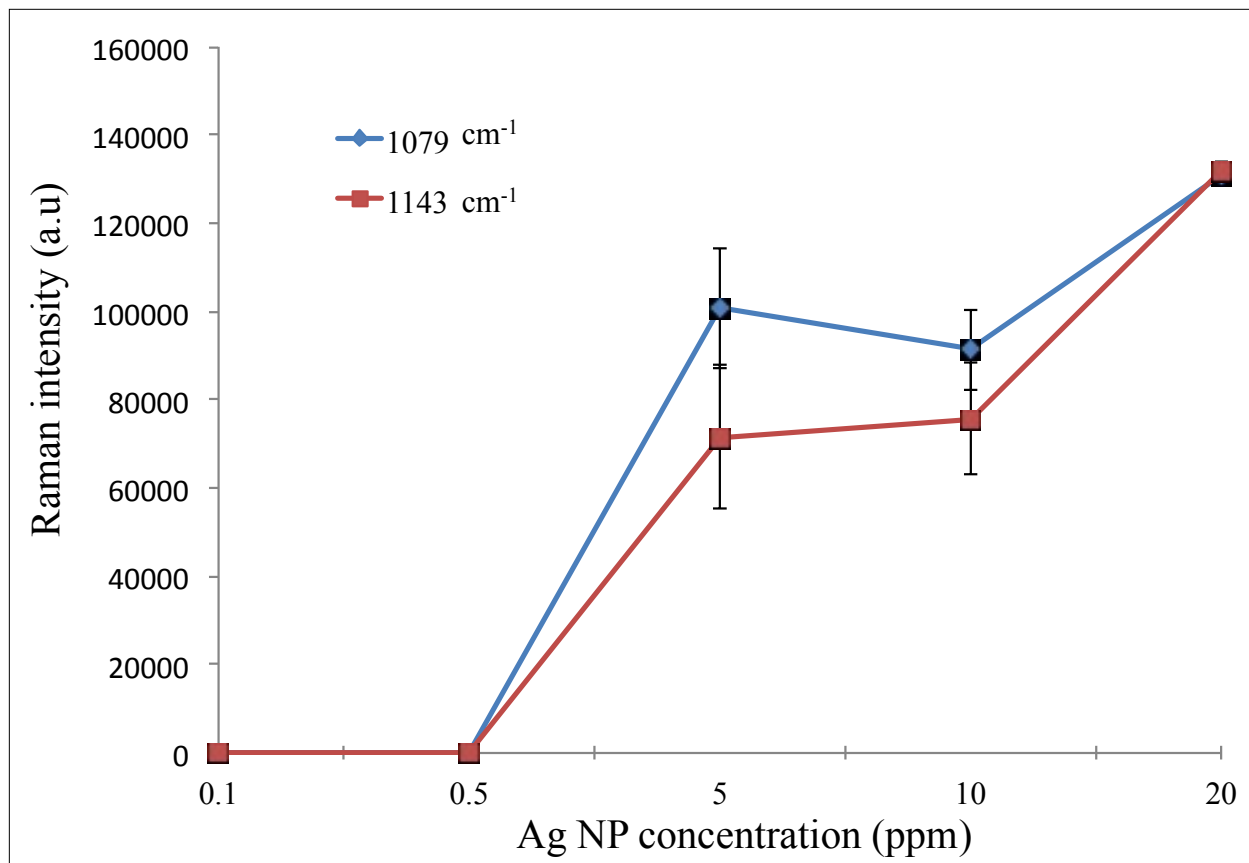

Supplement: c6an00835f1.pdf [file c6an00835f1.pdf]
